# Supplementary material for: Modification of the 4-Hydroxyphenylacetate-3-hydroxylase Substrate Pocket to Increase Activity towards Resveratrol
Source: MDPI journal article supplement (doi:10.3390/molecules28145602), 2023-07-24
Supplement: s1 [file s1]

## Supplementary Materials

**Table S1.** Bind poses obtained by docking of WT with resveratrol. Among them, the configuration highlighted in red is considered the most mode.

| <sup>4</sup> | mode     | Affinity (Kcat/mol) | Rmsd 1.b     | Rmsd u.b     |
|--------------|----------|---------------------|--------------|--------------|
|              | <b>1</b> | <b>-7.4</b>         | <b>0.000</b> | <b>0.000</b> |
|              | 2        | -7.4                | 0.100        | 2.010        |
|              | 3        | -7.3                | 0.163        | 1.182        |
|              | 4        | -7.3                | 1.468        | 7.257        |
|              | 5        | -7.2                | 1.402        | 7.404        |
|              | 6        | -7.2                | 2.527        | 3.760        |
|              | 7        | -7.2                | 2.449        | 3.339        |
|              | 8        | -7.2                | 6.289        | 7.278        |
|              | 9        | -7.2                | 6.300        | 7.449        |
|              | 10       | -7.1                | 6.226        | 7.413        |
|              | 11       | -7.1                | 5.578        | 6.789        |
|              | 12       | -7.1                | 5.565        | 6.557        |
|              | 13       | -7.1                | 5.852        | 7.390        |
|              | 14       | -7.1                | 5.570        | 6.763        |
|              | 15       | -7.1                | 5.567        | 6.582        |
|              | 16       | -7.0                | 5.644        | 6.693        |
|              | 17       | -6.7                | 5.852        | 6.693        |
|              | 18       | -6.7                | 1.868        | 7.206        |
|              | 19       | -6.4                | 2.931        | 7.163        |
|              | 20       | -6.3                | 2.928        | 7.282        |

**Table S2.** Bind poses obtained by docking of I157L/A211D with resveratrol. Among them, the configuration highlighted in red is considered the most mode.

| mode | Affinity (Kcat/mol) | Rmsd 1.b | Rmsd u.b |
|------|---------------------|----------|----------|
| 1    | -6.6                | 0.000    | 0.000    |
| 2    | -6.6                | 0.015    | 2.007    |
| 3    | -6.4                | 1.636    | 2.380    |
| 4    | -6.3                | 4.488    | 9.365    |
| 5    | -6.3                | 4.489    | 9.613    |
| 6    | -6.2                | 3.671    | 8.414    |
| 7    | -6.2                | 3.679    | 8.496    |
| 8    | -6.0                | 5.762    | 9.532    |
| 9    | -6.0                | 4.801    | 7.745    |
| 10   | -5.9                | 5.816    | 6.994    |
| 11   | -5.9                | 4.750    | 7.522    |
| 12   | -5.9                | 4.833    | 9.406    |
| 13   | -5.8                | 5.367    | 7.698    |
| 14   | -5.8                | 5.990    | 8.303    |
| 15   | -5.8                | 6.308    | 9.528    |
| 16   | -5.6                | 5.664    | 8.017    |
| 17   | -5.6                | 3.463    | 8.230    |
| 18   | -5.6                | 5.528    | 8.372    |
| 19   | -5.5                | 3.004    | 7.694    |
| 20   | -5.5                | 1.873    | 7.267    |

**Table S3.** Primers used for site-directed mutagenesis.

8

| <b>Mutation</b> | <b>Template</b> | <b>Primers (5'-3')</b> |                                 |
|-----------------|-----------------|------------------------|---------------------------------|
| I157A           | pETDuet-HpaBC   | Forward:               | TTTAACCACGCGGCAGTTAACCCACCGATCG |
|                 |                 | Reverse:               | CGGTGGGTAACTGCCGCGTGGTTAAAGTAG  |
| V158A           | pETDuet-HpaBC   | Forward:               | ACGCGATTGCTAACCCACCG            |
|                 |                 | Reverse:               | GGTGGGTAGCAATCGCGTG             |
| N159A           | pETDuet-HpaBC   | Forward:               | TTAACCACGCGATTGTTGCCCCACCG      |
|                 |                 | Reverse:               | GACGATCGATCGGTGGGGCAACAATC      |
| S210A           | pETDuet-HpaBC   | Forward:               | ATTGGCTTCGGCGCAGCACAAGTGATGG    |
|                 |                 | Reverse:               | CATCACTTGTGCTGCGCCGAAGCCAATC    |
| A211S           | pETDuet-HpaBC   | Forward:               | TTCGGCTCGGAGTAAGTGATGG          |
|                 |                 | Reverse:               | CATCACTTACTCCGAGCCGAAG          |
| Q212A           | pETDuet-HpaBC   | Forward:               | CTCGGCAGCTGTGATGGGCGAAAAC       |
|                 |                 | Reverse:               | GTTTTCGCCCATCACAGTGCCGAG        |
| S462A           | pETDuet-HpaBC   | Forward:               | TGAAATCAACTACGCCGGTAGCCAGG      |
|                 |                 | Reverse:               | TCCTGGCTACCGGCGTAGTTGATTTC      |

9

**Table S4.** Primers used for I157 site-saturating mutation.

10

| Mutation | Template      | Primers(5'-3') |                              |
|----------|---------------|----------------|------------------------------|
| I157V    | pETDuet-HpaBC | Forward:       | TAACCACGCGGTTGTTAACCCACCGAT  |
|          |               | Reverse:       | ATCGGTGGGTAAACAACCGCGTGGTTA  |
| I157C    | pETDuet-HpaBC | Forward:       | TAACCACGCGTGTGTTAACCCACCGAT  |
|          |               | Reverse:       | ATCGGTGGGTAAACACACGCGTGGTTA  |
| I157E    | pETDuet-HpaBC | Forward:       | TAACCACGCGGAAGTTAACCCACCGAT  |
|          |               | Reverse:       | ATCGGTGGGTAACTTCCGCGTGGTTA   |
| I157F    | pETDuet-HpaBC | Forward:       | TAACCACGCGTTCGTTAACCCACCGAT  |
|          |               | Reverse:       | ATCGGTGGGTAAACGAACGCGTGGTTA  |
| I157N    | pETDuet-HpaBC | Forward:       | TAACCACGCGAATGTTAACCCACCGAT  |
|          |               | Reverse:       | ATCGGTGGGTAAACATTCGCGTGGTTA  |
| I157K    | pETDuet-HpaBC | Forward:       | TAACCACGCGAAAGTTAACCCACCGAT  |
|          |               | Reverse:       | ATCGGTGGGTAACTTTTCGCGTGGTTA  |
| I157T    | pETDuet-HpaBC | Forward:       | TAACCACGCGACTGTTAACCCACCGAT  |
|          |               | Reverse:       | ATCGGTGGGTAAACAGTCGCGTGGTTA  |
| I157L    | pETDuet-HpaBC | Forward:       | TAACCACGCGCTTGTTAACCCACCGAT  |
|          |               | Reverse:       | ATCGGTGGGTAAACAAGCGCGTGGTTA  |
| I157R    | pETDuet-HpaBC | Forward:       | TAACCACGCGCGTGTTAACCCACCGAT  |
|          |               | Reverse:       | ATCGGTGGGTAAACACGCGCGTGGTTA  |
| I157H    | pETDuet-HpaBC | Forward:       | TAACCACGCGCATGTTAACCCACCGA-  |
|          |               | Reverse:       | TATCGGTGGGTAAACATGCGCGTGGTTA |
| I157Y    | pETDuet-HpaBC | Forward:       | TAACCACGCGTATGTTAACCCACCGAT  |
|          |               | Reverse:       | ATCGGTGGGTAAACATACGCGTGGTTA  |
| I157W    | pETDuet-HpaBC | Forward:       | TAACCACGCGTGGGTAAACCCACCGAT  |
|          |               | Reverse:       | ATCGGTGGGTAAACCCACGCGTGGTTA  |
| I157M    | pETDuet-HpaBC | Forward:       | TAACCACGCGATGGTTAACCCACCGAT  |
|          |               | Reverse:       | ATCGGTGGGTAAACCATCGCGTGGTTA  |
| I157Q    | pETDuet-HpaBC | Forward:       | TAACCACGCGCAAGTTAACCCACCGAT  |
|          |               | Reverse:       | ATCGGTGGGTAACTTGCGCGTGGTTA   |
| I157P    | pETDuet-HpaBC | Forward:       | TAACCACGCGCCTGTTAACCCACCGAT  |
|          |               | Reverse:       | ATCGGTGGGTAAACAGGCGCGTGGTTA  |
| I157G    | pETDuet-HpaBC | Forward:       | TAACCACGCGGGTGTTAACCCACCGAT  |
|          |               | Reverse:       | ATCGGTGGGTAAACACCCGCGTGGTTA  |
| I157D    | pETDuet-HpaBC | Forward:       | TAACCACGCGGATGTTAACCCACCGAT  |
|          |               | Reverse:       | ATCGGTGGGTAAACATCCGCGTGGTTA  |
| I157S    | pETDuet-HpaBC | Forward:       | TAACCACGCGTCTGTTAACCCACCGAT  |
|          |               | Reverse:       | ATCGGTGGGTAAACAGACGCGTGGTTA  |

11

Table S5. Primers used for A211 site-saturating mutation.

| Mutation | Template          | Primers(5'-3') |                              |
|----------|-------------------|----------------|------------------------------|
| A211V    | pETDuet<br>-HpaBC | Forward:       | TTGGCTTCGGCTCGGTTCAAGTGATGG  |
|          |                   | Reverse:       | CCATCACTTGAACCGAGCCGAAGCCAA  |
| A211C    | pETDuet<br>-HpaBC | Forward:       | TTGGCTTCGGCTCGTGTCAAGTGATGG  |
|          |                   | Reverse:       | CCATCACTTGACACGAGCCGAAGCCAA  |
| A211E    | pETDuet<br>-HpaBC | Forward:       | TTGGCTTCGGCTCGGAACAAGTGATGG  |
|          |                   | Reverse:       | CCATCACTTGTTCCGAGCCGAAGCCAA  |
| A211F    | pETDuet<br>-HpaBC | Forward:       | TTGGCTTCGGCTCGTTCCAAGTGATGG  |
|          |                   | Reverse:       | CCATCACTTGGAACGAGCCGAAGCCAA  |
| A211N    | pETDuet<br>-HpaBC | Forward:       | TTGGCTTCGGCTCGAATCAAGTGATGG  |
|          |                   | Reverse:       | CCATCACTTGATTCGAGCCGAAGCCAA  |
| A211K    | pETDuet<br>-HpaBC | Forward:       | TTGGCTTCGGCTCGAAGCAAGTGATGG  |
|          |                   | Reverse:       | CCATCACTTGCTTCGAGCCGAAGCCAA  |
| A211T    | pETDuet<br>-HpaBC | Forward:       | TTGGCTTCGGCTCGACTCAAGTGATGG  |
|          |                   | Reverse:       | CCATCACTTGAGTCGAGCCGAAGCCAA  |
| A211L    | pETDuet<br>-HpaBC | Forward:       | TTGGCTTCGGCTCGCTTCAAGTGATGG  |
|          |                   | Reverse:       | CCATCACTTGAAGCGAGCCGAAGCCAA  |
| A211R    | pETDuet<br>-HpaBC | Forward:       | TTGGCTTCGGCTCGAGACAAGTGATGG  |
|          |                   | Reverse:       | CCATCACTTGCTCTCGAGCCGAAGCCAA |
| A211H    | pETDuet<br>-HpaBC | Forward:       | TTGGCTTCGGCTCGCATCAAGTGATGG  |
|          |                   | Reverse:       | CCATCACTTGATGCGAGCCGAAGCCAA  |
| A211I    | pETDuet<br>-HpaBC | Forward:       | TTGGCTTCGGCTCGATTCAAGTGATGG  |
|          |                   | Reverse:       | CCATCACTTGAATCGAGCCGAAGCCAA  |
| A211Y    | pETDuet<br>-HpaBC | Forward:       | TTGGCTTCGGCTCGTATCAAGTGATGG  |
|          |                   | Reverse:       | CCATCACTTGATACGAGCCGAAGCCAA  |
| A211W    | pETDuet<br>-HpaBC | Forward:       | TTGGCTTCGGCTCGTGGCAAGTGATGG  |
|          |                   | Reverse:       | CCATCACTTGCCACGAGCCGAAGCCAA  |
| A211M    | pETDuet<br>-HpaBC | Forward:       | TTGGCTTCGGCTCGATGCAAGTGATGG  |
|          |                   | Reverse:       | CCATCACTTGCATCGAGCCGAAGCCAA  |
| A211Q    | pETDuet<br>-HpaBC | Forward:       | TTGGCTTCGGCTCGCAACAAGTGATGG  |
|          |                   | Reverse:       | CCATCACTTGTTGCGAGCCGAAGCCAA  |
| A211P    | pETDuet<br>-HpaBC | Forward:       | TTGGCTTCGGCTCGCCTCAAGTGATGG  |
|          |                   | Reverse:       | CCATCACTTGAGGCGAGCCGAAGCCAA  |
| A211G    | pETDuet<br>-HpaBC | Forward:       | TTGGCTTCGGCTCGGGACAAGTGATGG  |
|          |                   | Reverse:       | CCATCACTTGTCCTGAGCCGAAGCCAA  |
| A211D    | pETDuet<br>-HpaBC | Forward:       | TTGGCTTCGGCTCGGATCAAGTGATGG  |
|          |                   | Reverse:       | CCATCACTTGATCCGAGCCGAAGCCAA  |

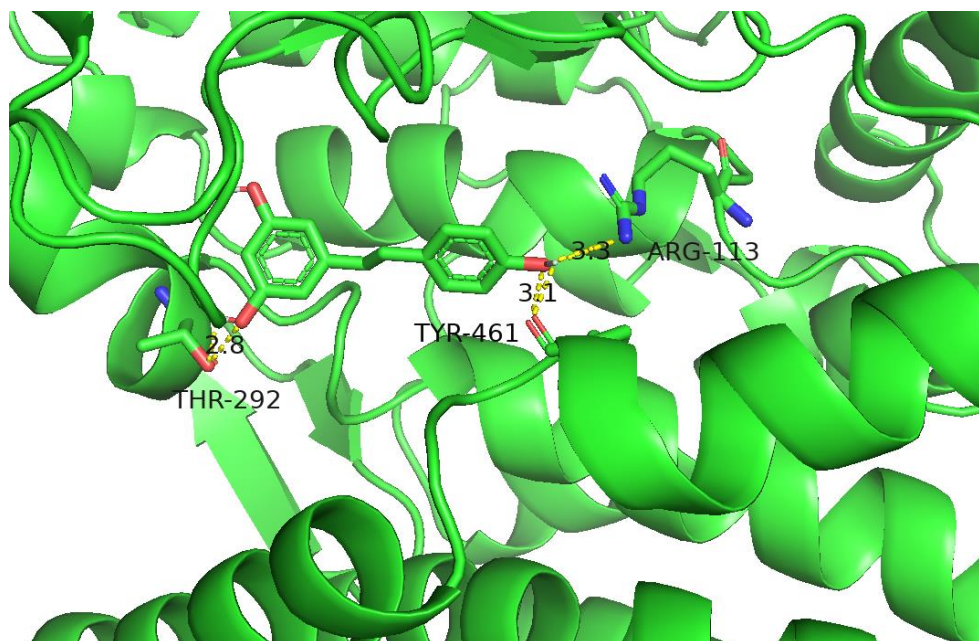

**Figure S1.** Number and length of hydrogen bonds between WT and resveratrol.

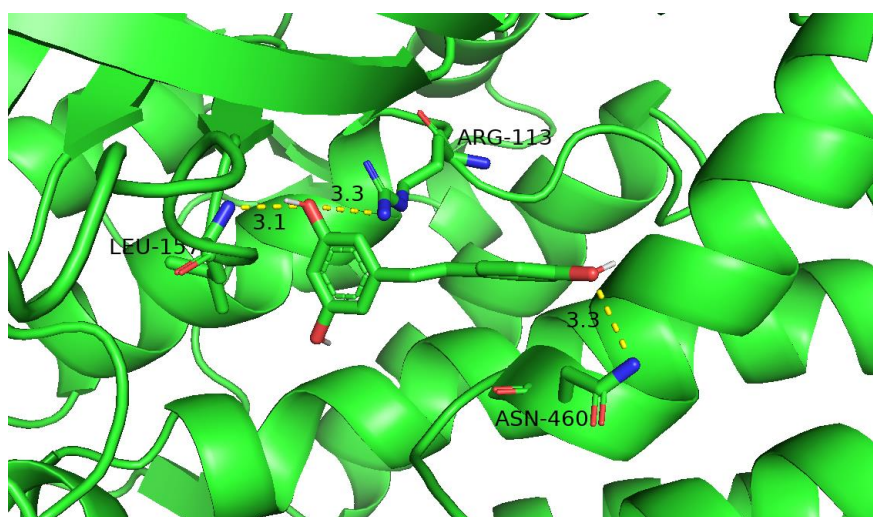

**Figure S2.** Number and length of hydrogen bonds between I157L/A211D and resveratrol.
